# Supplementary material for: Thirty-Day Mortality After Infection Among Persons With Severe Mental Illness: A Population-Based Cohort Study in Denmark
Source: Atypon-hosted journal article supplement (doi:10.1176/appi.ajp.2015.14091100), 2015-02-20
Supplement: appi.ajp.2015.14091100.ds001.pdf [file appi.ajp.2015.14091100.ds001.pdf]

**TABLE S1. Mortality rate ratios (MRRs) for infectious causes of death within 30 days after a hospitalization for any infection (N=9,812) among persons with SMI as compared to persons from without severe mental illness (SMI) in Denmark 1995-2010 (N=737,645)**

|                                  | No. of deaths (No SMI) | No. of deaths (SMI) | MRR (95% CI)     |
|----------------------------------|------------------------|---------------------|------------------|
| <b>Any infection<sup>a</sup></b> | 9,565                  | 247                 | 2.61 (2.30-2.96) |
| <b>Type of infection</b>         |                        |                     |                  |
| Sepsis                           | 1,338                  | 42                  | 2.58 (1.89-3.51) |
| Respiratory infections           |                        |                     |                  |
| Pneumonia                        | 6,013                  | 151                 | 2.81 (2.39-3.30) |
| Other respiratory <sup>b</sup>   | 66                     | -                   | -                |
| Gastrointestinal                 | 432                    | 13                  | 2.91 (1.67-5.07) |
| Urinary tract                    | 659                    | 14                  | 2.46 (1.44-4.18) |
| CNS                              | 429                    | 11                  | 1.80 (0.99-3.27) |
| HIV and Hepatitis                | 73                     | 5                   | 3.56 (1.43-8.84) |
| Other infections <sup>c</sup>    | 555                    | 11                  | 1.75 (0.96-3.19) |

The table shows the mortality rate ratios for infectious causes of death within 30 days after an admission for any infection among persons with a history of severe mental illness compared with persons without such a history.

Abbreviations: MRR: mortality rate ratio; CI: confidence interval; SMI: severe mental illness; CNS: central nervous system.

<sup>a</sup>Any infection = death due to any of the categories for infectious deaths

<sup>b</sup>No deaths among persons with SMI.

<sup>c</sup>Other deaths = the remaining causes of infectious deaths not included in any of the other categories.

The MRRs were adjusted for age, gender, and calendar period.

**FIGURE S1. Mortality rate ratios (MRRs) for all-cause mortality up to 30 days after first-time hospitalization for infections among persons with bipolar affective disorder as compared to persons without in Denmark in 1995-2011 (N=806,835)**

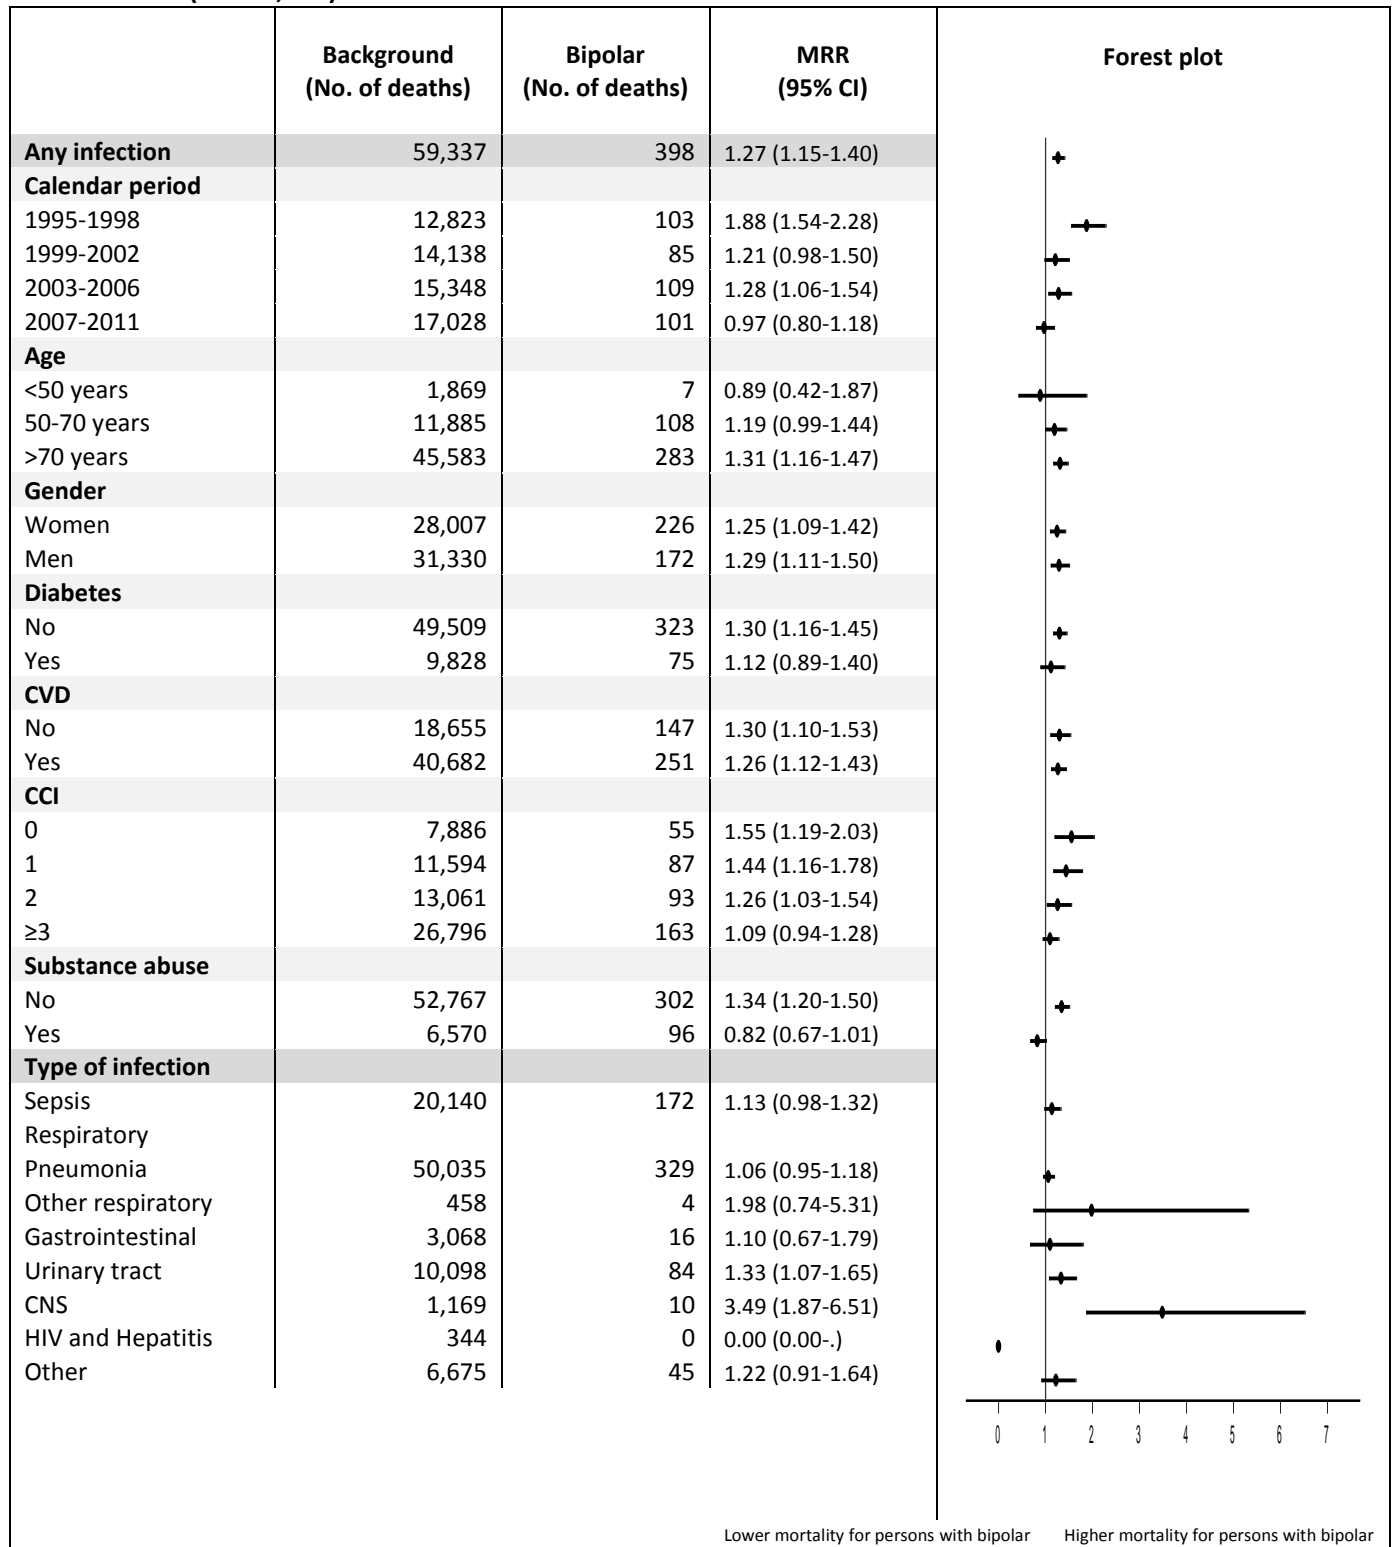

The figure shows the mortality rate ratios for all-cause mortality after a hospitalization for different categories of infections among persons with a history of bipolar affective disorder compared to persons without such a history. The MRRs were adjusted for age, gender, and calendar period. CVD=cardiovascular disease; CCI=Charlson comorbidity index.

**FIGURE S2. Mortality rate ratios (MRRs) for all-cause mortality up to 30 days after first-time hospitalization for infections among persons with schizophrenia as compared to persons without schizophrenia in Denmark in 1995-2011 (N=806,835)**

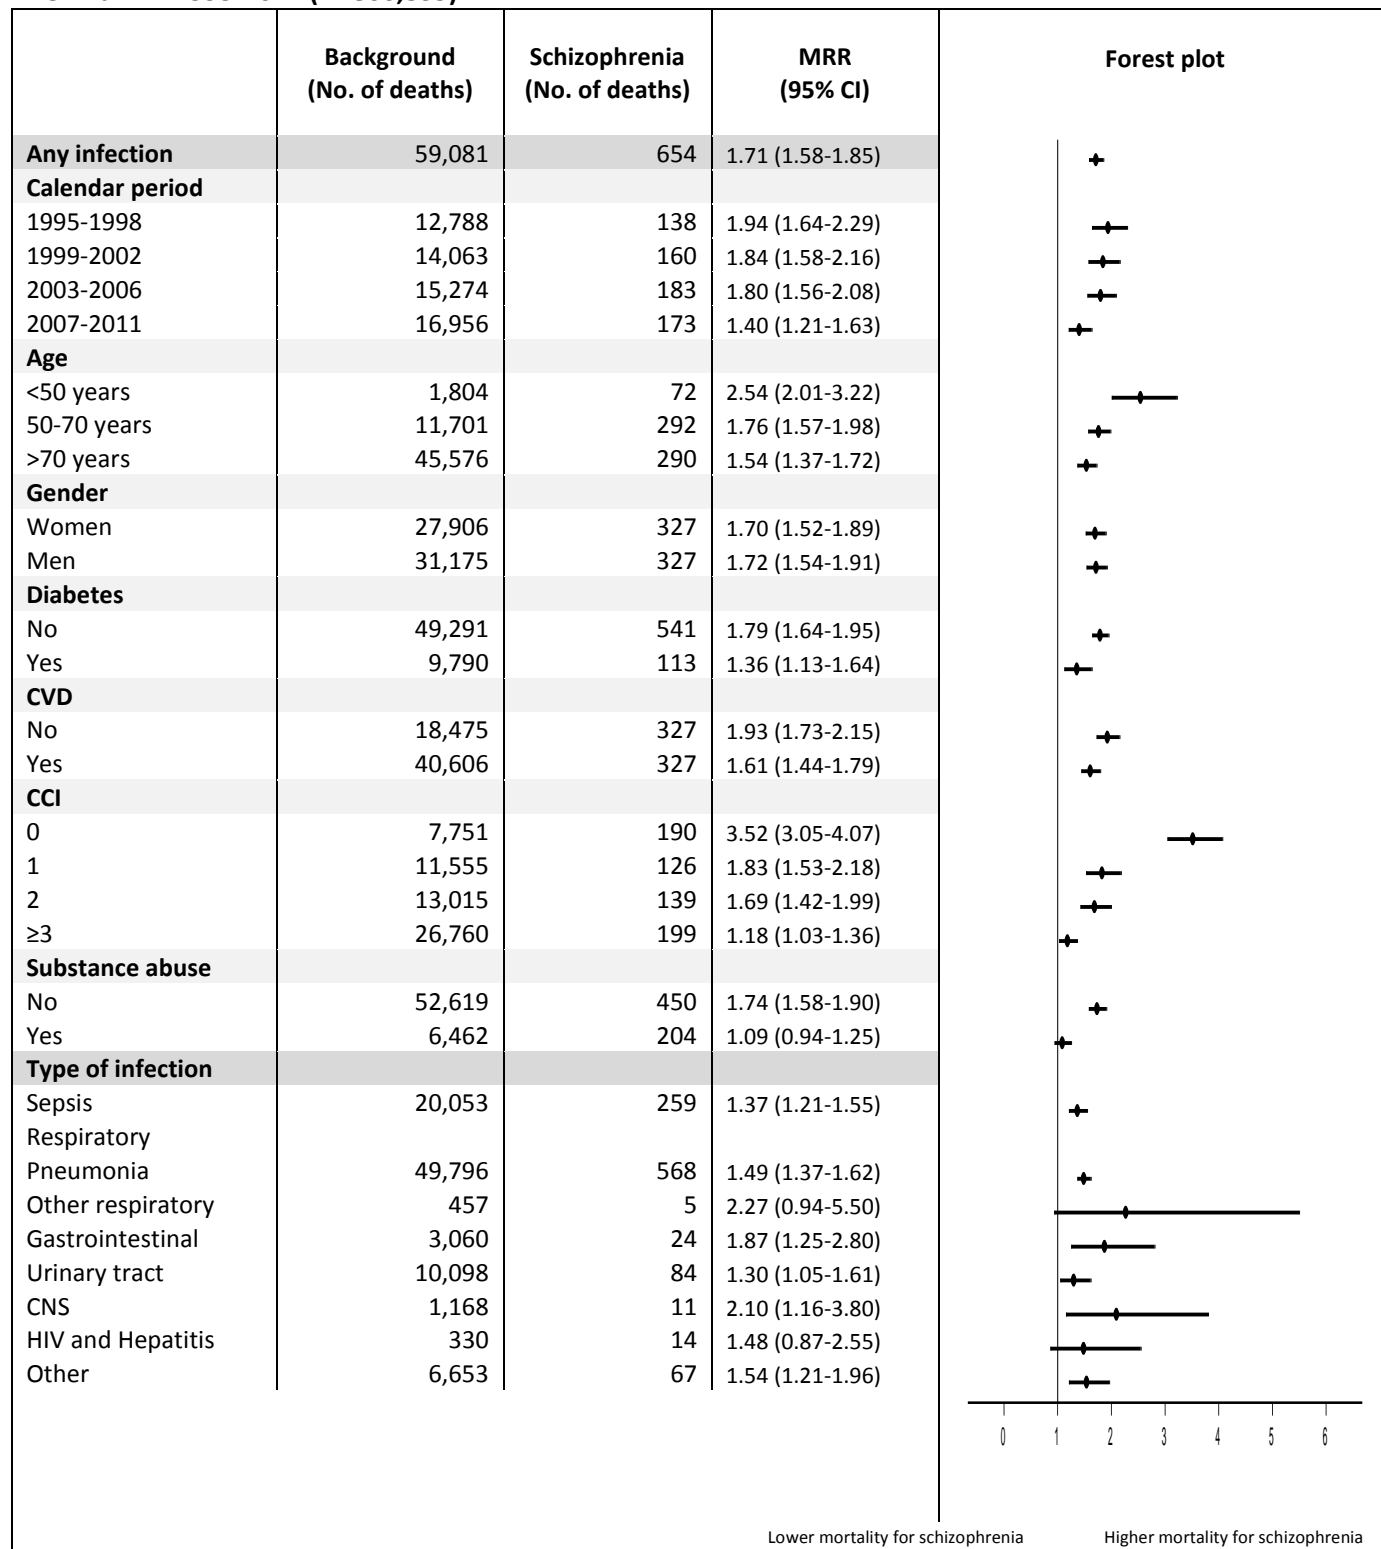

The figure shows the mortality rate ratios for all-cause mortality after a hospitalization for different categories of infections among persons with a history of schizophrenia compared to persons without such a history. The MRRs were adjusted for age, gender, and calendar period. CVD=cardiovascular disease; CCI=Charlson comorbidity index.

## APPENDIX: ICD Codes Used in the Study

| <b>Information on severe mental illness obtained from the Danish Psychiatric Central Register</b>         |                                                                                                                                                                                                                          |                                                                          |
|-----------------------------------------------------------------------------------------------------------|--------------------------------------------------------------------------------------------------------------------------------------------------------------------------------------------------------------------------|--------------------------------------------------------------------------|
|                                                                                                           | ICD-8                                                                                                                                                                                                                    | ICD-10                                                                   |
| Schizophrenia                                                                                             | 295 (excluding 295.79)                                                                                                                                                                                                   | F20                                                                      |
| Schizoaffective disorders                                                                                 | 295.79, 296.8                                                                                                                                                                                                            | F25                                                                      |
| Bipolar affective disorders                                                                               | 296.19, 296.39                                                                                                                                                                                                           | F30, F31                                                                 |
| <b>Information on hospital contacts for infections obtained from the Danish National Patient Register</b> |                                                                                                                                                                                                                          |                                                                          |
|                                                                                                           | ICD-10                                                                                                                                                                                                                   |                                                                          |
| Sepsis                                                                                                    | A40.0-41.9                                                                                                                                                                                                               |                                                                          |
| Respiratory infections                                                                                    |                                                                                                                                                                                                                          |                                                                          |
| Pneumonia                                                                                                 | J12.0-18.9, A48.1, A70.9                                                                                                                                                                                                 |                                                                          |
| Other respiratory infections                                                                              | J00.0-11.9                                                                                                                                                                                                               |                                                                          |
| Gastrointestinal infections                                                                               | A00.0-09.9, K35.0-35.9                                                                                                                                                                                                   |                                                                          |
| Urinary tract infections                                                                                  | N10.0-10.9, N30.0, N39.0                                                                                                                                                                                                 |                                                                          |
| Central nervous system infections                                                                         | A17.0-17.9, A32.1, A39.0, A81.0-81.9, A83.0-89.9, B00.3, B00.4, B01.0, B01.1, B02.0, B02.1 B05.0, B05.1, B06.0, B26.1, B26.2, B58.2, G00.0-01.9, G02.0, G02.1, G02.8, G03.0-04.9, G05.0, G05.1, G05.2, G05.8, G06.0-07.9 |                                                                          |
| HIV or hepatitis infections                                                                               | B15.0-19.9, B20.0-24.9                                                                                                                                                                                                   |                                                                          |
| Other infections                                                                                          | A00.0-B99.9 (excluding all the above-mentioned codes), L00.0-08.9, M00.0-00.9, N45.0-45.9, N70.0-72.9, N76.0-77.9, O23.0-23.9, O26.4, O85.0-86.9, O98.0-98.9                                                             |                                                                          |
| <b>Information on cardiovascular diseases obtained from the Danish National Patient Register</b>          |                                                                                                                                                                                                                          |                                                                          |
|                                                                                                           | ICD-8                                                                                                                                                                                                                    | ICD-10                                                                   |
| Cardiovascular diseases                                                                                   | 390-458                                                                                                                                                                                                                  | I00-I99                                                                  |
| <b>Information on the Charlson Comorbidity Index obtained from the Danish National Patient Register</b>   |                                                                                                                                                                                                                          |                                                                          |
|                                                                                                           | ICD-8                                                                                                                                                                                                                    | ICD-10                                                                   |
| Myocardial infarction                                                                                     | 410                                                                                                                                                                                                                      | I21;I22;I23                                                              |
| Congestive heart failure                                                                                  | 427.09, 427.10, 427.11, 427.19, 428.99, 782.49                                                                                                                                                                           | I50; I11.0; I13.0; I13.2                                                 |
| Peripheral vascular disease                                                                               | 440, 441, 442, 443, 444, 445,                                                                                                                                                                                            | I70; I71; I72; I73; I74; I77                                             |
| Cerebrovascular disease                                                                                   | 430-438                                                                                                                                                                                                                  | I60-I69; G45; G46                                                        |
| Dementia                                                                                                  | 290.09-290.19, 293.09                                                                                                                                                                                                    | F00-F03; F05.1; G30                                                      |
| Chronic pulmonary disease                                                                                 | 490-493, 515-518                                                                                                                                                                                                         | J40-J47; J60-J67; J68.4; J70.1; J70.3; J84.1; J92.0; J96.1; J98.2; J98.3 |

|                                                                                                                                                    |                                                                      |                                                                |
|----------------------------------------------------------------------------------------------------------------------------------------------------|----------------------------------------------------------------------|----------------------------------------------------------------|
| Connective tissue disease                                                                                                                          | 712, 716, 734, 446, 135.99                                           | M05; M06; M08;<br>M09;M30;M31; M32; M33;<br>M34; M35; M36; D86 |
| Ulcer disease                                                                                                                                      | 530.91, 530.98, 531-534,                                             | K22.1; K25-K28                                                 |
| Mild liver disease                                                                                                                                 | 571, 573.01, 573.04                                                  | B18; K70.0-K70.3; K70.9; K71;<br>K73; K74; K76.0               |
| Diabetes mellitus                                                                                                                                  | 249.00, 249.06, 249.07,<br>249.09, 250.00, 250.06,<br>250.07, 250.09 | E10.0, E10.1; E10.9; E11.0;<br>E11.1; E11.9                    |
| Hemiplegia                                                                                                                                         | 344                                                                  | G81; G82                                                       |
| Moderate/severe renal<br>Disease                                                                                                                   | 403,404,580-583, 584,<br>590.09, 593.19, 753.10-<br>753.19, 792      | I12; I13; N00-N05; N07; N11;<br>N14; N17-N19; Q61              |
| Diabetes mellitus with<br>chronic complications                                                                                                    | 249.01-249.05, 249.08,<br>250.01-250.05, 250.08                      | E10.2-E10.8; E11.2-E11.8                                       |
| Any tumour                                                                                                                                         | 140-194                                                              | C00-C75                                                        |
| Leukaemia                                                                                                                                          | 204-207                                                              | C91-C95                                                        |
| Lymphoma                                                                                                                                           | 200-203, 275.59                                                      | C81-C85; C88; C90; C96                                         |
| Moderate/severe liver<br>Disease                                                                                                                   | 070.00, 070.02, 070.04,<br>070.06, 070.08, 573.00,<br>456.00-456.09  | B15.0; B16.0; B16.2; B19.0;<br>K70.4; K72; K76.6; I85          |
| Metastatic solid tumour                                                                                                                            | 195-198, 199                                                         | C76-C80                                                        |
| AIDS                                                                                                                                               | 079.83                                                               | B21-B24                                                        |
| <b>Information on substance abuse disorders obtained from the Danish National Patient Register<br/>and the Danish Psychiatric Central Register</b> |                                                                      |                                                                |
|                                                                                                                                                    | ICD-8                                                                | ICD-10                                                         |
| <b>Drug related</b>                                                                                                                                |                                                                      |                                                                |
| Opioids                                                                                                                                            | 304.09, 304.19                                                       | F11.0–F11.9                                                    |
| Cannabinoids                                                                                                                                       | 304.59                                                               | F12.0–F12.9                                                    |
| Sedatives/hypnotics                                                                                                                                | 304.29, 304.39                                                       | F13.0–F13.9                                                    |
| Cocaine                                                                                                                                            | 304.49                                                               | F14.0–F14.9                                                    |
| Other stimulants                                                                                                                                   | 304.69                                                               | F15.0–15.9                                                     |
| Hallucinogens                                                                                                                                      | 304.79                                                               | F16.0–F16.9                                                    |
| Other and multiple drugs                                                                                                                           | 304.89, 304.99                                                       | F18.0–F19.9                                                    |
| <b>Alcohol related</b>                                                                                                                             |                                                                      |                                                                |
| Alcohol psychosis and abuse<br>syndrome                                                                                                            | 291.09–291.99<br>303.09–303.99                                       | F10.0–F10.9                                                    |
| Cirrhosis of the liver                                                                                                                             | 571.09, 571.19                                                       | K70.0–K70.9                                                    |
| Oesophageal varices                                                                                                                                | 456.09, 456.19                                                       | I85.0–I85.9                                                    |
